# Supplementary figures and images for: Conversion of 99mtechnetium-pyrophosphate scintigraphy in a patient with hereditary ATTR amyloidosis: importance of repeat scanning
Source: PubMed Central journal article supplement — Eur Heart J Case Rep. 2020 Nov 9;4(6):1–2. doi: 10.1093/ehjcr/ytaa386 (PMC7793235; doi:10.1093/ehjcr/ytaa386), 2020-11-09

## Supplementary Data

Figure S1

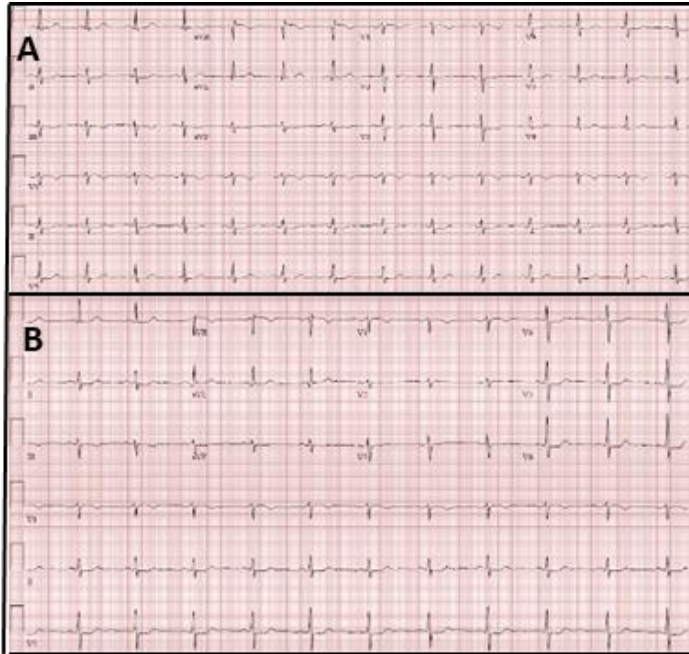

Figure S2

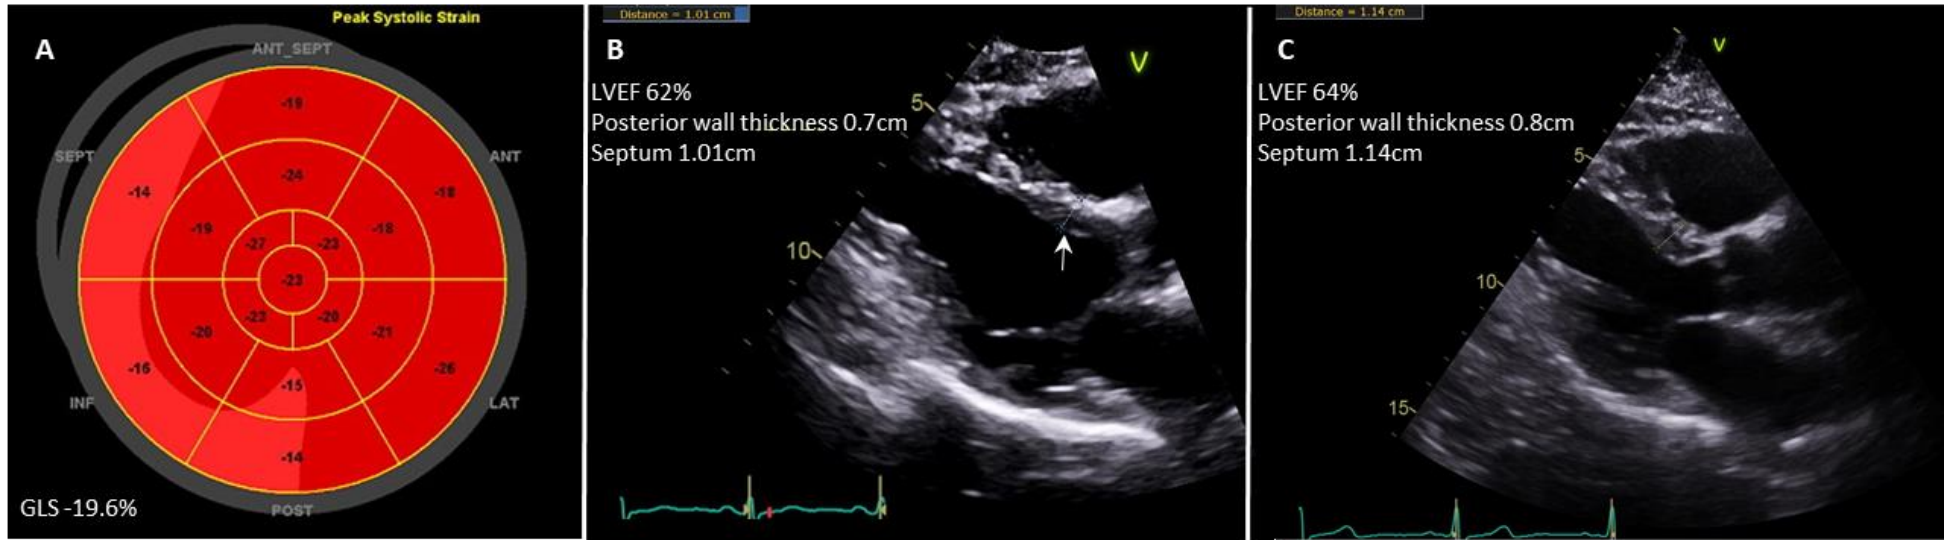

Supplement: ytaa386_supplementary_data.pdf [file ytaa386_supplementary_data.pdf]
